# Supplementary material for: Discrimination between 5-hydroxymethylcytosine and 5-methylcytosine by a chemically designed peptide
Source: Royal Society of Chemistry journal article supplement (doi:10.1039/c1cc12131f), 2011-01-01
Supplement: c1cc12131f.pdf [file c1cc12131f.pdf]

## Supplementary Information

### Discrimination between 5-hydroxymethylcytosine and 5-methylcytosine by a chemically designed peptide

Akiko Nomura,<sup>1</sup> Kaori Sugizaki,<sup>1</sup> Hiroyuki Yanagisawa,<sup>1</sup> Akimitsu Okamoto<sup>1,2,\*</sup>

<sup>1</sup>Advanced Science Institute, RIKEN, Wako, Saitama 351-0198, Japan, <sup>2</sup>PRESTO, Japan Science and Technology Agency, 4-1-8 Honcho, Kawaguchi, Saitama 332-0012, Japan

\*Phone, +81-48-467-9238; Fax, +81-48-467-9205; e-mail, aki-okamoto@riken.jp

### Experimental Section

**Synthesis of hydroxymethylated DNA.** The 5-hydroxymethyl-2'-deoxycytidine phosphoramidite was synthesized according to the facile synthetic protocol (*Org. Biomol. Chem.*, 2011, **9**, 4176.). A hydroxymethylated DNA was synthesized by the conventional phosphoramidite method by using an Applied Biosystems 392 DNA/RNA synthesizer. Synthesized DNA was purified by reverse phase HPLC on a 5-ODS-H column (10 × 150 mm, elution with a solvent mixture of 0.1 M triethylammonium acetate (pH = 7.0), linear gradient over 20 min from 5% to 20% acetonitrile at a flow rate 3.0 mL/min).

**Peptide Synthesis and Characterization.** The peptide **1** was synthesized on an automatic peptide synthesizer (Model 433A, Applied Biosystems) using the Fmoc solid-phase method on an amide resin (Rink Amide MBHA resin, Novabiochem). After synthesis, the peptides were cleaved from the resin and deprotected by treatment with trifluoroacetic acid/triisopropylsilane/1,2-ethanedithiol/water (94/1/2.5/2.5 v/v) and purified by HPLC on Chemcobond 5-ODS-H (10 × 150 mm, Chemco Scientific). The obtained peptide was characterized by MALDI-TOF mass spectrometry. [M + H]<sup>+</sup> calcd, 7335.5; found, 7335.3.

**Gel Mobility Shift Assays.** The DNA strands used in the assay were as follows: G-strand, <sup>32</sup>P-5'-TTT ATA TTA AAT ATT ATG GGG [C<sup>m</sup>C<sup>hm</sup>C]GGG GGC CAA TAT ATT A-3'; C-strand, 5'-TAA TAT ATT GGC CC[C<sup>m</sup>C<sup>hm</sup>C] GCC CCA TAA TAT TTA ATA TAA A-3' (underlines, the sequences to be recognized by the peptide). The <sup>32</sup>P-labeled G-strand was annealed with the unlabeled complementary C-strand. The reaction mixture containing the hybridized DNA (50 pM, 500 cpm) and the zinc finger peptide (0–10 μM) was incubated in 20 mM Tris-HCl (pH 8.0), 100 mM sodium chloride, 100 μM zinc chloride, 1 mM tris(2-carboxyethyl)phosphine (TCEP), 0.05% Nonidet P-40, 5% glycerol, 40 ng/μL bovine serum albumin, and 100 ng/μL poly(dI-dC) for 30 min at 4 °C. The reaction mixture was analyzed by polyacrylamide gel electrophoresis in Tris-borate buffer (pH 8.3) at 4 °C. The bands were visualized by autoradiography and quantified using Image Gauge version 4.01 software (Fujifilm). The dissociation constant ( $K_d$ ) of the peptide for the target DNA was evaluated by curve-fitting the band intensities to the equation:  $F = [P]/([P] + K_d)$ , where  $F$  and  $[P]$  represent the fraction of the peptide-bound DNA and the total peptide concentration, respectively.

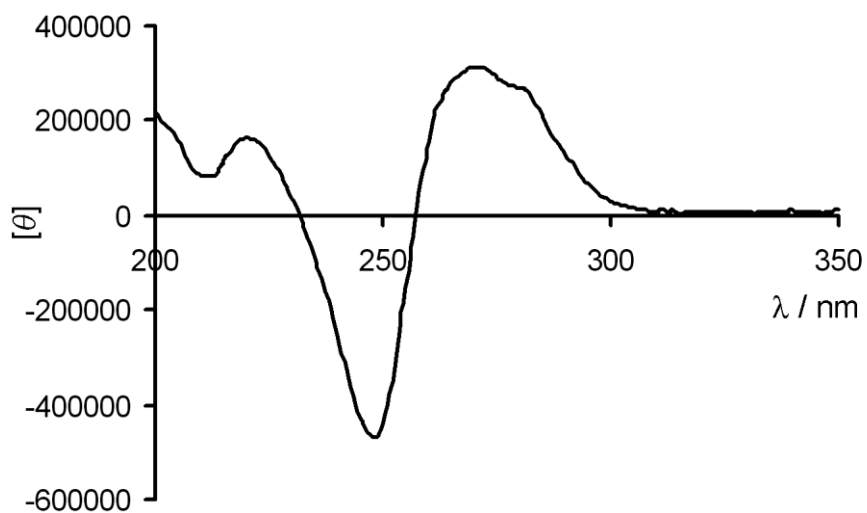

**Fig. S1** CD spectrum of 5'-TTT ATA TTA AAT ATT ATG GGG <sup>m</sup>CGG GGC CAA TAT ATT A-3'/5'-TAA TAT ATT GGC CC<sup>m</sup>C GCC CCA TAA TAT TTA ATA TAA A-3'. The measurement of the duplex (10 μM) was carried out in 20 mM Tris-HCl buffer (pH 8.0) containing 100 mM sodium chloride at 4 °C.

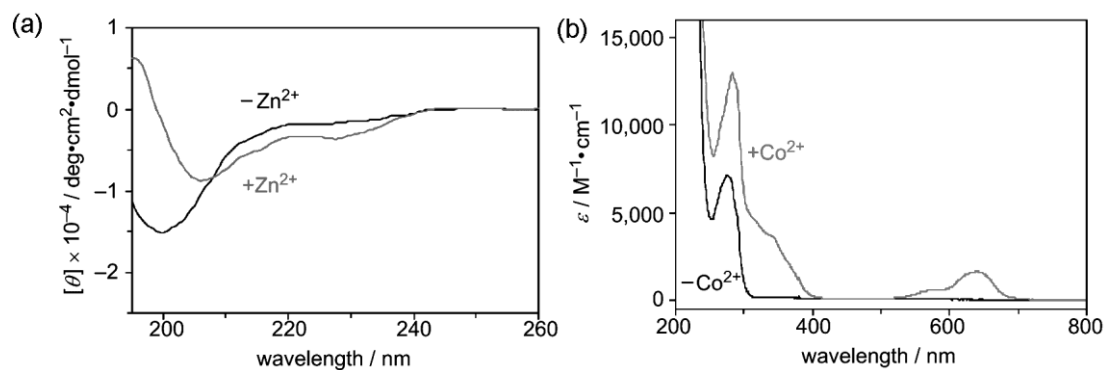

**Fig. S2** Structure of peptide **1**. (a) CD spectra of the peptides in the absence (apo forms, black) or presence (zinc finger forms, gray) of 3 equiv zinc chloride. The peptide concentrations were 18  $\mu\text{M}$  for **1**. Measurements were carried out in 10 mM Tris-HCl buffer (pH 7.5) containing 50 mM sodium chloride and 0.1 mM TCEP at 4 °C under nitrogen. (b) Absorption spectra of **1** (72  $\mu\text{M}$ ) in the absence (apo forms, black) or presence (cobalt complex forms, gray) of 300  $\mu\text{M}$  cobalt chloride in 10 mM Tris-HCl buffer (pH = 7.5) containing 50 mM sodium chloride at 20 °C under nitrogen.

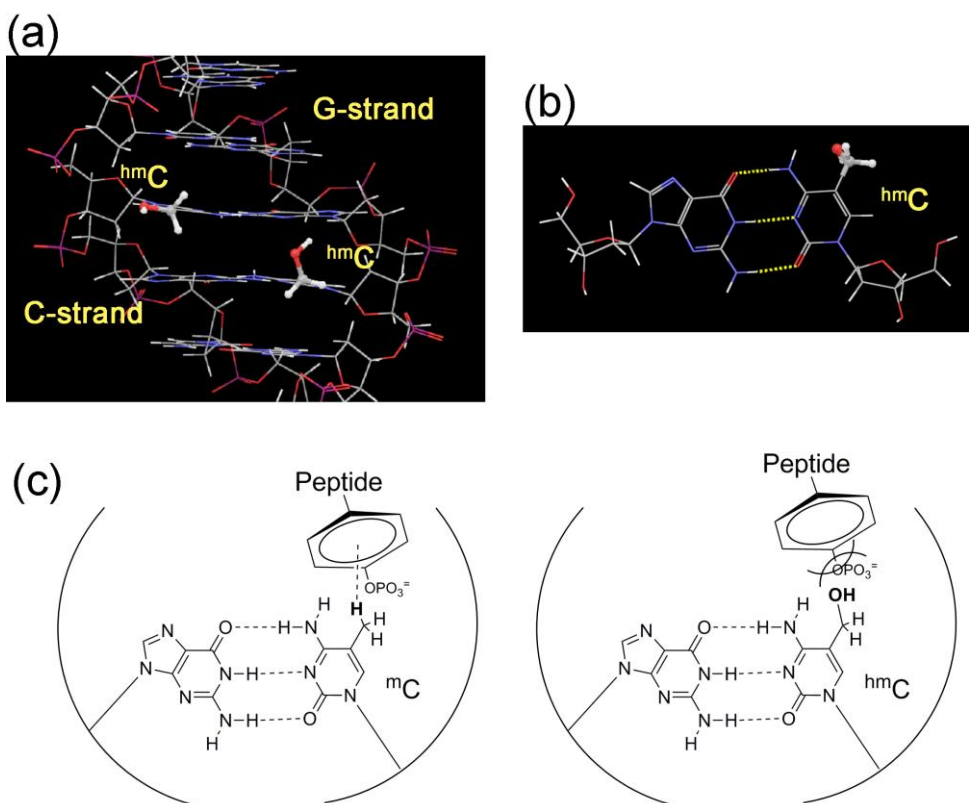

**Fig. S3** A plausible structure of an <sup>hm</sup>C-containing DNA duplex. (a) Side view of G<sup>hm</sup>CGG/CG<sup>hm</sup>CC DNA and (b) top view of the <sup>hm</sup>C/G base pair in (a). The structures were minimized with OPLS2005 in MacroModel 9.8. (c) Interaction with peptide. The hydroxy group of <sup>hm</sup>C was extruded toward the outside of the DNA major groove. The location of the hydroxy group would sterically hinder the interaction between peptide pY and DNA.
